# Supplementary material for: Real‐life effectiveness 1 year after switching to avalglucosidase alfa in late‐onset Pompe disease patients worsening on alglucosidase alfa therapy: A French cohort study
Source: PubMed Central journal article supplement — Eur J Neurol. 2024 Apr 8;31(7):e16292. doi: 10.1111/ene.16292 (PMC11235864; doi:10.1111/ene.16292), 2024-04-08
Supplement: ENE-31-e16292-s001.pdf [file ENE-31-e16292-s001.pdf]

| Sex    | Age at the first symptoms (in years) | Age at the diagnosis (in years) | Non-invasive ventilation (NIV) | duration of NIV (in hours/day) | Invasive ventilation | Ambulatory status                                     | Weight (in kg) | Height (in cm) |
|--------|--------------------------------------|---------------------------------|--------------------------------|--------------------------------|----------------------|-------------------------------------------------------|----------------|----------------|
| male   | 30                                   | 43                              | nocturnal                      | 10                             | no                   | 2: WITH A WALKER                                      | 79             | 180            |
| female | 30                                   | 39                              | nocturnal                      | 6                              | no                   | 1: WITH A CANE                                        | 82             | 161            |
| male   | 63                                   | 66                              | nocturnal and diurnal          | 10                             | no                   | 1: WITH A CANE                                        | 80             | 176            |
| female | 13                                   | 45                              | nocturnal                      | 11                             | no                   | 4: ELECTRIC CHAIR                                     | 60             | 146            |
| female | 35                                   | 30                              | nocturnal and diurnal          | 10                             | no                   | 2: WITH A WALKER                                      | 86             | 163            |
| female | 32                                   | 43                              | nocturnal                      | 5                              | no                   | 2b: manual wheelchair outdoor/indoor walker           | 115            | 157            |
| female | 30                                   | 61                              | nocturnal and diurnal          | 18                             | no                   | 4: ELECTRIC CHAIR                                     | 82             | 159            |
| male   | 30                                   | 49                              | nocturnal                      | 4                              | no                   | 3: USING THE MANUAL CHAIR                             | 72             | 171            |
| male   | 49                                   | 49                              | no                             |                                | no                   | 1: WITH A CANE                                        | 78             | 162            |
| female | 50                                   | 55                              | nocturnal                      | 8                              | no                   | 2b: manual wheelchair outdoor/indoor walker           | 74             | 155            |
| male   | 26                                   | 39                              | no                             |                                | no                   | 0: WITHOUT HELP                                       | 96             | 187            |
| male   | 57                                   | 60                              | no                             |                                | no                   | 1: WITH A CANE                                        | 71             | 174            |
| male   | 54                                   | 60                              | no                             |                                | no                   | 1: WITH A CANE                                        | 70             | 176            |
| male   | 14                                   | 37                              | nocturnal and diurnal          | 8                              | no                   | 4: ELECTRIC CHAIR                                     | 49             | 184            |
| female | 38                                   | 60                              | no                             |                                | no                   | 0: WITHOUT HELP                                       | 98             | 165            |
| female | 18                                   | 31                              | no                             |                                | no                   | 1: WITH A CANE                                        | 53             | 175            |
| female | 27                                   | 44                              | nocturnal                      | 15                             | no                   | 4: ELECTRIC CHAIR                                     | 74             | 170            |
| female | 38                                   | 45                              | nocturnal                      | 9                              | no                   | 2: WITH A WALKER                                      | 69             | 152            |
| male   | NA                                   | 16                              | nocturnal                      | 9                              | no                   | 4: ELECTRIC CHAIR                                     | 78             | 168            |
| female | 27                                   | 33                              | no                             |                                | no                   | 1: WITH A CANE                                        | 55             | 162            |
| female | NA                                   | 49                              | no                             |                                | no                   | 0: WITHOUT HELP                                       | 85             | 162            |
| female | 9                                    | 9                               | nocturnal                      | 11                             | no                   | 2b: electric chair outside - WITHOUT ASSISTANCE <500m | 58             | 164            |
| male   | 23                                   | 28                              | nocturnal                      | 13                             | no                   | 0: WITHOUT HELP                                       | 98             | 173            |
| female | 10                                   | 20                              | no                             |                                | no                   | 0: WITHOUT HELP                                       | 55             | 172            |
| male   | 39                                   | 40                              | no                             |                                | no                   | 0: WITHOUT HELP                                       | 87             | 178            |
| female | 38                                   | 43                              | no                             |                                | no                   | 0: WITHOUT HELP                                       | 62             | 160            |
| male   | 43                                   | 45                              | no                             |                                | no                   | 0: WITHOUT HELP                                       | 80             | 176            |
| male   | 13                                   | 30                              | no                             |                                | no                   | 0: WITHOUT HELP                                       | 62             | 170            |
| female | 2                                    | 24                              | nocturnal                      | 5                              | no                   | 0: WITHOUT HELP                                       | 45             | 159            |
